# Supplementary material for: Motivators, Barriers, and Facilitators to Traveling to the Safest Hospitals in the United States for Complex Cancer Surgery
Source: PubMed Central journal article supplement (PMC6324377; doi:10.1001/jamanetworkopen.2018.4595), 2018-11-16
Supplement: jamanetwopen-1-e184595-s001.pdf [file jamanetwopen-1-e184595-s001.pdf]

## Supplementary Online Content

Resio BJ, Chiu AS, Hoag JR, et al. Motivators, barriers, and facilitators to traveling to the safest hospitals in the United States for complex cancer surgery. *JAMA Netw Open*. 2018;1(7):e184595. doi:10.1001/jamanetworkopen.2018.4595

### **eAppendix 1.** Survey Questionnaire

**eTable 1.** Unweighted and Weighted Demographics of Respondents

**eTable 2.** Characteristics of Responders vs Nonresponders

**eTable 3.** Distribution of Respondents Who Would Stay at Their Local Hospital vs Travel to a Specialty Hospital One Hour Away for Specific Improvements in Outcomes

**eTable 4.** Multivariable Logistic Regression Analysis of Demographics Associated With Respondent's Resistant to Moving to a Specialty Hospital for An Improvement in Outcomes

**eTable 5.** Multivariable Logistic Regression Analysis of Demographics Associated With Having 3 or More Barriers (restricted cohort)

**eAppendix 2.** Short Answer Responses From the Respondents Who Would Travel to the Specialty Hospital Despite Minimal Quantitative Benefit

**eTable 6.** Subset Analysis of Respondents With a History of Cancer or Prior Surgery

**eFigure 1.** Thresholds to Travel (increase in cure rate)

**eFigure 2.** Thresholds to Travel (reduction in infection rate)

This supplementary material has been provided by the authors to give readers additional information about their work.

## eAppendix 1. Survey Questionnaire

Base: all respondents

Demographic Question (Select all that apply)

Which of the following things are true, if any?

1. I make my own medical decisions
2. I have been diagnosed with cancer in the past
3. I have had surgery in the past
4. None of these are true of me

Base: all respondents

**Q01**

How long does it currently take you to get to the hospital you use most often?

(If you have not gone to a hospital recently, how long would it take for you to get to a hospital from where you live?)

\_\_\_ (hours) \_\_\_ (minutes)

Base: all respondents

Imagine you have been diagnosed with cancer. A complex surgery is the best way to cure your cancer. Your choices for surgery are a smaller hospital close to home, and a hospital that specializes in cancer surgery that is 1 hour farther away than your local hospital. It is unclear if safety is the same at both hospitals (the chances of dying after surgery may be higher at one hospital than the other).

Base: Total respondents

**Q03a**

Which hospital would you choose?

| Your Local Hospital                  | Specialty Hospital (1 hour farther away) |
|--------------------------------------|------------------------------------------|
| Chances of dying from surgery<br>10% | Chances of dying from surgery<br>10%     |
|                                      |                                          |

Base: Q3a=1 (local)

**Q03b**

Which hospital would you choose?

| Your Local Hospital                  | Specialty Hospital (1 hour farther away) |
|--------------------------------------|------------------------------------------|
| Chances of dying from surgery<br>10% | Chances of dying from surgery<br>9%      |
|                                      |                                          |

Base: Q3b=1 (local)

**Q03c**

Which hospital would you choose?

| Your Local Hospital                  | Specialty Hospital (1 hour farther away) |
|--------------------------------------|------------------------------------------|
| Chances of dying from surgery<br>10% | Chances of dying from surgery<br>7%      |
|                                      |                                          |

Base: Q3c=1 (local)

**Q03d**

Which hospital would you choose?

| Your Local Hospital                  | Specialty Hospital (1 hour farther away) |
|--------------------------------------|------------------------------------------|
| Chances of dying from surgery<br>10% | Chances of dying from surgery<br>5%      |
|                                      |                                          |

Base: Q3d=1 (local)

**Q03e**

Which hospital would you choose?

| Your Local Hospital                  | Specialty Hospital (1 hour farther away) |
|--------------------------------------|------------------------------------------|
| Chances of dying from surgery<br>10% | Chances of dying from surgery<br>3%      |
|                                      |                                          |

Base: Q3e=1 (local)

**Q03f**

Which hospital would you choose?

| Your Local Hospital                  | Specialty Hospital (1 hour farther away)             |
|--------------------------------------|------------------------------------------------------|
| Chances of dying from surgery<br>10% | Chances of dying from surgery<br><b>Less than 1%</b> |
|                                      |                                                      |

Base: all respondents

**Q04**

Even if you thought surgery was better at the specialty hospital, which of the following things (if any) would prevent you from travelling 1 hour to the specialty hospital for surgery?

Statements in row [RANDOMIZE AND RECORD ORDER OF THE STATEMENTS]:

1. Needing a ride to travel an hour
2. Having to drive myself in traffic
3. Parking is expensive at the specialty hospital
4. Having enough money to pay to travel an hour (hire a taxi, pay for bus or subway)
5. I need to be home to take care of somebody
6. I need to be home to take care of a pet
7. I need to be home to take care of a business I own
8. I need to be home to take care of my house or apartment (pay bills, yard work)
9. My family and friends would have difficulty visiting me at a farther hospital
10. Surgery at the specialty hospital would cost more money
11. My insurance restricts me from going to a specialty hospital
12. My work won't let me get that much time off
13. I would have a hard time going back and forth to see doctors after surgery

Answers in column:

1. Would prevent me from traveling an hour
2. Would not prevent me

Base: all respondents

**Q05[Grid,S per row]**

If you thought surgery was better at the specialty hospital, if given to you for free, which of the following things (if any) would make it possible for you to travel 1 hour to the specialty hospital for surgery?

Statements in row [RANDOMIZE AND RECORD ORDER OF THE STATEMENTS]:

1. Free rides to any hospital
2. Free help caring for somebody that lives with you
3. Free help caring for a pet that lives with you
4. Free help taking care of your house or apartment
5. Free rides for your friends and family to visit you at any hospital
6. A free place for your family to stay close to the specialty hospital
7. Surgery at both hospitals costs the same amount of money
8. My insurance will pay for surgery at any hospital I want to go to

Answers in column:

1. I would travel to the specialty hospital
2. I would stay at the local hospital

Base: all respondents

### Q06

Several organizations are trying to make information about hospitals and surgeons easier for patients to see. Nobody knows if this information is helpful to patients. What information (if any) would cause you to travel 1 hour to have surgery at a specialty hospital (instead of having surgery at a local hospital close to home)?

Statements in row [RANDOMIZE AND RECORD ORDER OF THE STATEMENTS]:

1. The surgeon at the specialty hospital is safer (fewer patients die after surgery)
2. The surgeon at the specialty hospital is more likely to get all of the cancer out (not leave cancer behind)
3. Patients at the speciality hospital have lower chances of getting an infection after surgery
4. Patients at the specialty hospital are less likely to have complications after surgery
5. The specialty hospital performs more of your needed surgeries
6. Patients at the specialty hospital are more likely to be cured

Answers in column:

1. I would likely go to the specialty hospital
2. I would stay at the local hospital

Base: [SHOW IF Q06\_1=1]

**Q06a1 [Q, RANGE 0-15]**

*You told us you would go to the specialty hospital if the surgeon at the specialty hospital is safer (fewer patients die after surgery).*

Tell us how much safer the specialty surgeon would need to be, for you to go the specialty hospital.

“If 15% of people die after surgery with the local surgeon, I would only go the specialty surgeon if his or her rate of patients dying was less than [NUMBOX, RANGE 0-15]%.”

Base: [SHOW IF Q06\_2=1]

**Q06a2 [Q, RANGE 80-100]**

*You told us you would go to the specialty hospital if surgery at the specialty hospital is more likely to get all of the cancer out (not leave cancer behind).*

Tell us how much better the specialty hospital would need to be, for you to go the specialty hospital.

“If 80% of patients of people have all their cancer removed at the local hospital, I would only go the specialty hospital if more than [NUMBOX, RANGE 80-100]% of patients had all their cancer removed.”

Base: [SHOW IF Q06\_3=1]

**Q06a3 [Q, RANGE 0-20]**

*You told us you would go to the specialty hospital if the specialty hospital has lower chances of getting an infection after surgery.*

Tell us how much safer the specialty hospital would need to be, for you to go the specialty hospital.

“If 20% of the patients at the local hospital get an infection in the hospital, I would only go to the specialty hospital if their rates were lower than [NUMBOX, RANGE 0-20]%.”

Base: [SHOW IF Q06\_4=1]

**Q06a4 [Q, RANGE 0-40]**

*You told us you would go to the specialty hospital if the specialty hospital has fewer complications after surgery.*

Tell us how much safer the specialty hospital would need to be, for you to go the specialty hospital.

“If 40% of the patients at the local hospital have a complication after surgery, I would only go to the specialty hospital if the rate of complications was less than [NUMBOX, RANGE 0-40]%.”

**eTable 1.** Unweighted and Weighted Demographics of Respondents

|                               | Number of Respondents | Percent of Respondents | Weighted Percent of Respondents |
|-------------------------------|-----------------------|------------------------|---------------------------------|
| Sex                           |                       |                        |                                 |
| Male                          | 525                   | 51.7                   | 48.4                            |
| Female                        | 491                   | 48.3                   | 51.6                            |
| Age                           |                       |                        |                                 |
| 18-29                         | 167                   | 16.4                   | 21.1                            |
| 30-44                         | 210                   | 20.7                   | 25.0                            |
| 45-59                         | 277                   | 27.3                   | 26.0                            |
| 60+                           | 362                   | 35.6                   | 27.9                            |
| Race/ Ethnicity               |                       |                        |                                 |
| White, Non-Hispanic           | 716                   | 70.5                   | 64.0                            |
| Black, Non-Hispanic           | 108                   | 10.6                   | 11.8                            |
| Other, Non-Hispanic           | 47                    | 4.6                    | 4.8                             |
| Hispanic                      | 112                   | 11.0                   | 15.9                            |
| 2+ Races, Non-Hispanic        | 33                    | 3.3                    | 3.5                             |
| Annual Household Income       |                       |                        |                                 |
| <\$30000                      | 174                   | 17.1                   | 19.2                            |
| \$30-60k                      | 228                   | 22.4                   | 22.9                            |
| \$60-100k                     | 321                   | 31.6                   | 23.4                            |
| \$100-200k                    | 299                   | 29.4                   | 28.2                            |
| >200K                         | 69                    | 6.8                    | 3.4                             |
| Urban/ Rural                  |                       |                        |                                 |
| Non-Metro                     | 155                   | 15.3                   | 14.6                            |
| Metro                         | 861                   | 84.7                   | 85.4                            |
| US Region                     |                       |                        |                                 |
| Northeast                     | 165                   | 16.2                   | 17.8                            |
| Midwest                       | 241                   | 23.7                   | 20.8                            |
| South                         | 367                   | 36.1                   | 37.7                            |
| West                          | 243                   | 23.9                   | 23.7                            |
| Education level               |                       |                        |                                 |
| Less than high school         | 74                    | 7.3                    | 9.6                             |
| High school                   | 255                   | 25.1                   | 30.3                            |
| Some college                  | 292                   | 28.7                   | 28.6                            |
| Bachelor's degree or higher   | 395                   | 38.9                   | 31.5                            |
| Had Major Surgery in the Past |                       |                        |                                 |
| Yes                           | 512                   | 49.6                   | 46.5                            |
| No                            | 504                   | 50.4                   | 53.6                            |

|                             |     |      |      |
|-----------------------------|-----|------|------|
| Had Cancer in the Past      |     |      |      |
| Yes                         | 89  | 8.8  | 7.5  |
| No                          | 927 | 91.2 | 92.6 |
| Makes Own Medical Decisions |     |      |      |
| Yes                         | 848 | 83.5 | 82.2 |
| No                          | 168 | 16.5 | 17.8 |



**eTable 2.** Characteristics of Responders vs Nonresponders

|                            | Responders<br>(n=1016) |       | Non- responders<br>(n=792) |       | P<br>Value |
|----------------------------|------------------------|-------|----------------------------|-------|------------|
|                            | #                      | %     | #                          | %     |            |
| Sex                        |                        |       |                            |       |            |
| Male                       | 525                    | 51.7% | 361                        | 45.6% | 0.01       |
| Female                     | 491                    | 48.3% | 431                        | 54.4% | 0.01       |
| Age                        |                        |       |                            |       |            |
| 18-29                      | 167                    | 16.4% | 214                        | 27.0% | <.001      |
| 30-44                      | 210                    | 20.7% | 232                        | 29.3% | <.001      |
| 45-59                      | 277                    | 27.3% | 209                        | 26.4% | 0.67       |
| 60+                        | 362                    | 35.6% | 127                        | 16.0% | <.001      |
| Race/ Ethnicity            |                        |       |                            |       |            |
| White, Non-Hispanic        | 716                    | 70.5% | 463                        | 58.5% | <.001      |
| Black, Non-Hispanic        | 108                    | 10.6% | 128                        | 16.2% | <.001      |
| Other, Non-Hispanic        | 47                     | 4.6%  | 35                         | 4.4%  | 0.83       |
| Hispanic                   | 112                    | 11.0% | 136                        | 17.2% | <.001      |
| 2+ Races, Non-Hispanic     | 33                     | 3.2%  | 30                         | 3.8%  | 0.53       |
| Annual Household<br>Income |                        |       |                            |       |            |
| <\$30,000                  | 174                    | 17.1% | 175                        | 22.1% | 0.008      |
| \$30,000-59,999            | 228                    | 22.4% | 206                        | 26.0% | 0.08       |
| \$60,000-99,999            | 321                    | 31.6% | 177                        | 22.3% | <.001      |
| \$100,000-200,000          | 299                    | 29.4% | 182                        | 23.0% | 0.002      |
| >\$200,000                 | 69                     | 6.8%  | 52                         | 6.6%  | 0.85       |
| Urban/ Rural               |                        |       |                            |       |            |
| Non-Metro                  | 155                    | 15.3% | 110                        | 13.9% | 0.41       |
| Metro                      | 861                    | 84.7% | 682                        | 86.1% | 0.41       |
| US Region                  |                        |       |                            |       |            |
| Northeast                  | 165                    | 16.2% | 158                        | 19.9% | 0.04       |
| Midwest                    | 241                    | 23.7% | 137                        | 17.3% | <.001      |
| South                      | 367                    | 36.1% | 322                        | 40.7% | 0.05       |
| West                       | 243                    | 23.9% | 175                        | 22.1% | 0.36       |
| Education level            |                        |       |                            |       |            |
| Less than high school      | 74                     | 7.3%  | 91                         | 11.5% | 0.002      |
| High school                | 255                    | 25.1% | 256                        | 32.3% | <.001      |
| Some college               | 292                    | 28.7% | 230                        | 29.0% | 0.89       |

|                             |     |       |     |       |       |
|-----------------------------|-----|-------|-----|-------|-------|
| Bachelor's degree or higher | 395 | 38.9% | 215 | 27.1% | <.001 |
|-----------------------------|-----|-------|-----|-------|-------|

**eTable 3.** Distribution of Respondents Who Would Stay at Their Local Hospital vs Travel to a Specialty Hospital One Hour Away for Specific Improvements in Outcomes

| Prompt                                                                                                      | Stay at local Hospital, N (%)* | Travel to Specialty Hospital, N (%)* |
|-------------------------------------------------------------------------------------------------------------|--------------------------------|--------------------------------------|
| Patients at the specialty hospital have lower chances of getting an infection after surgery                 | 87 (8.6)                       | 929 (91.4)                           |
| Patients at the specialty hospital are more likely to be cured                                              | 81 (8.0)                       | 935 (92.0)                           |
| Patients at the specialty hospital are less likely to have complications after surgery                      | 78 (7.7)                       | 938 (92.3)                           |
| The surgeon at the specialty hospital is safer (fewer patients die after surgery)                           | 82 (8.1)                       | 934 (91.9)                           |
| The surgeon at the specialty hospital is more likely to get all of the cancer out (not leave cancer behind) | 80 (7.9)                       | 935 (92.1)                           |
| The specialty hospital performs more of your needed surgeries                                               | 93 (9.2)                       | 922 (90.7)                           |

\*Frequencies and percentages are weighted to be nationally representative.

**eTable 4.** Multivariable Logistic Regression Analysis of Demographics Associated With Respondent’s Resistant to Moving to a Specialty Hospital for An Improvement in Outcomes

| Effect                                  | N           | Adjusted* Odds Ratio | 95% Confidence Limits |      | P Value |
|-----------------------------------------|-------------|----------------------|-----------------------|------|---------|
| High school vs college education        | 329 vs. 687 | 1.09                 | 0.71                  | 1.70 | 0.69    |
| Metro vs non-metro                      | 861 vs. 155 | 2.08                 | 1.01                  | 4.28 | 0.05    |
| Age <36 vs 36-50                        | 254 vs. 201 | 0.53                 | 0.28                  | 0.99 | 0.04    |
| Age 51-65 vs 35-50                      | 331 vs. 201 | 1.20                 | 0.70                  | 2.07 | 0.10    |
| Age 66-80 vs 35-50                      | 200 vs. 201 | 0.99                 | 0.52                  | 1.87 | 0.57    |
| Age >80 vs 35-50                        | 30 vs. 201  | 0.77                 | 0.21                  | 2.86 | 0.82    |
| Race non-white vs. white                | 300 vs. 716 | 1.60                 | 1.05                  | 2.42 | 0.03    |
| Income <25k vs >25K                     | 133 vs. 883 | 2.01                 | 1.19                  | 3.39 | 0.01    |
| Female vs Male                          | 491 vs. 525 | 1.49                 | 0.99                  | 2.23 | 0.06    |
| Does not make medical decisions vs does | 168 vs. 848 | 1.38                 | 0.83                  | 2.27 | 0.21    |
| Cancer in the past vs no cancer         | 89 vs. 927  | 2.07                 | 1.05                  | 4.07 | 0.03    |
| No surgery in past vs yes               | 504 vs. 512 | 1.94                 | 1.23                  | 3.06 | 0.00    |
| Time to local hospital <1hr vs >1hr     | 989 vs. 27  | 0.66                 | 0.23                  | 1.88 | 0.44    |

\*Model is adjusted for education, residence in a metropolitan statistical area, age, ethnicity, income, sex, previous surgery or cancer diagnosis, and travel time from one’s local hospital

**eTable 5.** Multivariable Logistic Regression Analysis of Demographics Associated With Having 3 or More Barriers (restricted cohort)

| Effect                                  | N           | Adjusted* Odds Ratio | 95% Confidence Limits |      | P Value |
|-----------------------------------------|-------------|----------------------|-----------------------|------|---------|
| High school Vs College Education        | 329 vs. 687 | 1.33                 | 0.98                  | 1.80 | 0.07    |
| Metro vs Non-Metro                      | 861 vs. 155 | 1.34                 | 0.89                  | 2.02 | 0.16    |
| age <36 vs 36-50                        | 254 vs. 201 | 1.17                 | 0.79                  | 1.75 | 0.01    |
| age 51-65 vs 35-50                      | 331 vs. 201 | 0.68                 | 0.46                  | 1.01 | 0.31    |
| age 66-80 vs 35-50                      | 200 vs. 201 | 0.69                 | 0.44                  | 1.09 | 0.46    |
| age >80 vs 35-50                        | 30 vs. 201  | 0.54                 | 0.22                  | 1.35 | 0.29    |
| Race Non-white vs. White                | 300 vs. 716 | 0.76                 | 0.56                  | 1.03 | 0.07    |
| Income <25k vs >25K                     | 133 vs. 883 | 2.90                 | 1.94                  | 4.33 | <.001   |
| Female vs Male                          | 491 vs. 525 | 1.66                 | 1.25                  | 2.20 | <.001   |
| Does not make medical decisions vs Does | 168 vs. 848 | 1.07                 | 0.73                  | 1.57 | 0.72    |
| No Cancer in the past vs Yes            | 89 vs. 927  | 1.21                 | 0.70                  | 2.11 | 0.49    |
| No Surgery in past vs Yes               | 504 vs. 512 | 1.08                 | 0.80                  | 1.47 | 0.61    |
| Time to local hospital <1hr vs >1hr     | 989 vs. 27  | 1.00                 | 0.42                  | 2.37 | 0.99    |

\*Model is adjusted for education, residence in a metropolitan statistical area, age, ethnicity, income, sex, previous surgery or cancer diagnosis, and travel time from one's local hospital

**eAppendix 2.** Short Answer Responses From the Respondents Who Would Travel to the Specialty Hospital Despite Minimal Quantitative Benefit

| <b>Is there any other information about the differences between specialty hospitals and local hospitals that would make you go to the specialty hospital? (only answered by 47/160 of these respondents)</b>                                                |
|-------------------------------------------------------------------------------------------------------------------------------------------------------------------------------------------------------------------------------------------------------------|
| Bedside manner and not as many forms to fill                                                                                                                                                                                                                |
| Better care during and after surgery.                                                                                                                                                                                                                       |
| Better reputation of the doctors, better transparency in costs.                                                                                                                                                                                             |
| Cleaner, better organized, faster response time, reputation, choice of Doctors                                                                                                                                                                              |
| Given the previous safety concerns are equal, I would be MUCH more inclined if at all possible to go to a specialty hospital just because there are so many other factors specific to a type of condition that they should be better prepared to deal with. |
| How well they treat patients and their families. Our local hospital is very good with patient relations and amenities. However, for services requiring specialization, my wife and I have learned that university based hospitals like University of ***    |
| I am a patient of *** Hospital and I would recommend it to anybody.                                                                                                                                                                                         |
| I believe the specialty hospital would have the most up-to-date research available to draw on, and if the case calls for it perhaps be more inclined to try treatments that are new.                                                                        |
| I will always go with a place that specializes in a certain treatment, it is common sense to me.                                                                                                                                                            |
| I would ALWAYS go to the specialty hospital                                                                                                                                                                                                                 |
| I would always choose the specialty hospital because I believe that they would be more informed and better equipped to handle my problem.                                                                                                                   |
| I would always choose the specialty hospital no matter the cost or travel since there is a better outcome there.                                                                                                                                            |
| I would choose the specialty hospital, because that's there area of expertise.                                                                                                                                                                              |
| I would go to a specialty hospital no matter what the circumstances. I feel that the staff at a specialty hospital should have the experience and equipment to do a better job and should have seen more cases of cancer than a local hospital.             |
| I would go to the specialty hospital for the experience of the surgeon alone, even if all other factors were the same as the local hospital.                                                                                                                |
| I would go to the specialty hospital no matter what.                                                                                                                                                                                                        |
| I would go where my doc tells me to go.                                                                                                                                                                                                                     |
| I would not need to travel one hour further to a specialty hospital, as these types of facilities are fairly close to my home.                                                                                                                              |
| I'm pretty sure I said I would go the specialty hospital, but you kept asking me questions like I said I'd use the local hospital. 1 hour drive is worth any percentage better care/less risk to me.                                                        |
| If there was a complication with the surgery or the recovery, the specialty hospital would likely be more equipped to handle it.                                                                                                                            |

|                                                                                                                                                                                                                                                                 |
|-----------------------------------------------------------------------------------------------------------------------------------------------------------------------------------------------------------------------------------------------------------------|
| Just if the doctors are more qualified and can grantee that it is better or I have more chance of beating what i have there than at the other hospital                                                                                                          |
| Just the fact that by being a specialty hospital, I feel that the staff would be more qualified to take care of me if I had that condition.                                                                                                                     |
| <b>Is there any other information about the differences between specialty hospitals and local hospitals that would make you go to the specialty hospital? (only answered by 47/160 of these respondents)</b>                                                    |
| More advanced treatments or techniques. More experience and better equipment for the particular cancer.                                                                                                                                                         |
| More logical plans of treatment.                                                                                                                                                                                                                                |
| More qualified staff will be at a specialty hospital and the staff is prepared for an emergency if something should happened during surgery                                                                                                                     |
| My local hospitals are awful. Most of the time we travel 2hrs for anything serious.                                                                                                                                                                             |
| No matter what, I will still choose a specialty to treat me.                                                                                                                                                                                                    |
| Overall comfort for me and my family.                                                                                                                                                                                                                           |
| Quality of the surgeon and staff.                                                                                                                                                                                                                               |
| Reviews from others who have had the same surgery performed at the special hospital.                                                                                                                                                                            |
| Specialities just seem more in tune with specific needs because they deal with so many patients in that area. In the same way I would prefer to go to a birthing center rather than a general hospital, I would prefer to go to a specialty cancer facility tha |
| Specialty hospitals typically have more experienced doctors and are focused on only one specialty, so I would trust their expertise more than a general practitioner/surgeon.                                                                                   |
| Statistics...just give me statistics.                                                                                                                                                                                                                           |
| Success rates are more common as the number of surgeries performed rises. A surgeon at a specialty hospital is likely to have performed more such relevant surgeries than a surgeon at a local hospital.                                                        |
| The doctors are more up to date with current treatments. They also have subspecialty/specialty conferences (tumor boards) where individual cases are discussed to mutiple oncology specialities. This way they can add their input. The speciality hospitals a  |
| These answers are kind of meaningless in my case, since I would definitely go to a specialty hospital if I had a complicated surgery to do. I don't need convincing or help - I would just go to a hospital that specializes in my type of surgery. To me, a    |
| What is up with the free rides, free pet care, free whatever else nonsense questions? They don't apply to 98% of people!!!!                                                                                                                                     |
| Would they also do rehab or reconstructive surgery?                                                                                                                                                                                                             |
| depends on protocals                                                                                                                                                                                                                                            |
| type of cancer and treatment options                                                                                                                                                                                                                            |
| good service, good hospitality and good utility                                                                                                                                                                                                                 |
| if the specialty hospital was rated highly, such as being in the top ten of the country.                                                                                                                                                                        |
| its an unfair question - there's comfort level with surgeon to consider, nurses, after care - its just not a percentage type scenario                                                                                                                           |

|                                                                                                                                                                                                               |
|---------------------------------------------------------------------------------------------------------------------------------------------------------------------------------------------------------------|
| locally where I live the specialty hospital has no cases of mersa. All other hospitals in the area have had several cases of mersa. Patients are dying because of the mersa not the problem they went in for. |
| reputation of the specialty hospital vs. the local                                                                                                                                                            |
| word of mouth, previous patient experiences....news/investigational news reports.....3rd party rankings, etc.                                                                                                 |
| yes, the specialty hospital specializes in that field of care                                                                                                                                                 |



**eTable 6.** Subset Analysis of Respondents With a History of Cancer or Prior Surgery

| <b>Motivators</b>                                                                                           | <b>Healthcare experienced<br/>(n=472)</b> | <b>Healthcare naïve<br/>(n=544)</b> | <b>P Value</b> |
|-------------------------------------------------------------------------------------------------------------|-------------------------------------------|-------------------------------------|----------------|
|                                                                                                             | <b>n (%)<br/>motivated</b>                | <b>n (%)<br/>motivated</b>          |                |
| Patients at the specialty hospital have lower chances of getting an infection after surgery                 | 445 (94)                                  | 484 (89)                            | 0.002          |
| Patients at the specialty hospital are more likely to be cured                                              | 450 (95)                                  | 485 (89)                            | <0.001         |
| Patients at the specialty hospital are less likely to have complications after surgery                      | 450 (95)                                  | 488 (90)                            | <0.001         |
| The surgeon at the specialty hospital is safer (fewer patients die after surgery)                           | 450 (95)                                  | 484 (89)                            | <0.001         |
| The surgeon at the specialty hospital is more likely to get all of the cancer out (not leave cancer behind) | 450 (95)                                  | 486 (89)                            | <0.001         |
| The specialty hospital performs more of your needed surgeries                                               | 446 (95)                                  | 476 (88)                            | <0.001         |
| Overall motivators                                                                                          | 449 (95)                                  | 484 (89)                            | <0.001         |
| <b>Barriers</b>                                                                                             |                                           |                                     |                |
| Percent with barriers                                                                                       | 358 (76)                                  | 398 (73)                            | 0.3279         |
| <b>Facilitators</b>                                                                                         |                                           |                                     |                |
| Percent with barriers who would travel with one or more corresponding solutions                             | 447 (93)                                  | 508 (91)                            | 0.3767         |

**eFigure 1.** Thresholds to Travel (increase in cure rate)

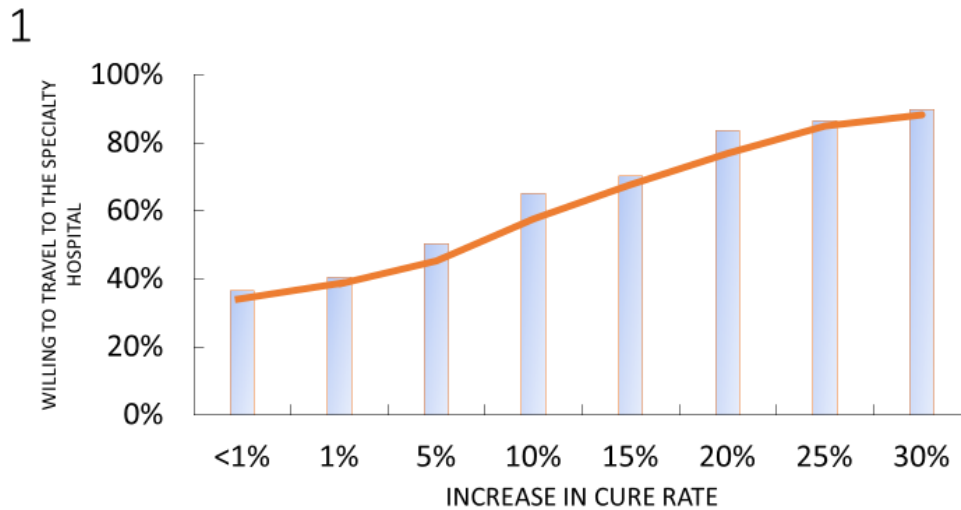

The percentage of respondents who would travel to the specialty hospital is shown (y-axis), across a range of margins by which the specialty hospital was superior to the local hospital (x-axis). A separate by graph is shown for the remaining 2 of 6 quality and safety indicators including 1) increase in cure rate, 2) Reduction in infection rate. Each bar represents the total percentage that would travel at any given threshold (and therefore includes respondents who indicated a specific threshold or any smaller margin).

**eFigure 2.** Thresholds to Travel (reduction in infection rate)

2

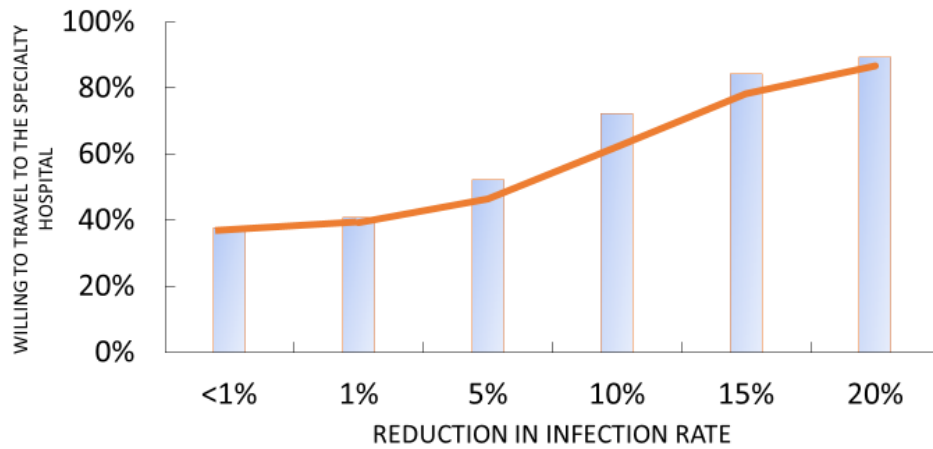

The percentage of respondents who would travel to the specialty hospital is shown (y-axis), across a range of margins by which the specialty hospital was superior to the local hospital (x-axis). A separate bar graph is shown for the remaining 2 of 6 quality and safety indicators including 1) increase in cure rate, 2) Reduction in infection rate. Each bar represents the total percentage that would travel at any given threshold (and therefore includes respondents who indicated a specific threshold or any smaller margin).
